# Supplementary material
Source: PubMed Central journal article supplement (PMC5513158)

## Supplementary Figure 1 Uncropped versions of the blots shown in Extended Data Figure 3d with protein standards in kDa

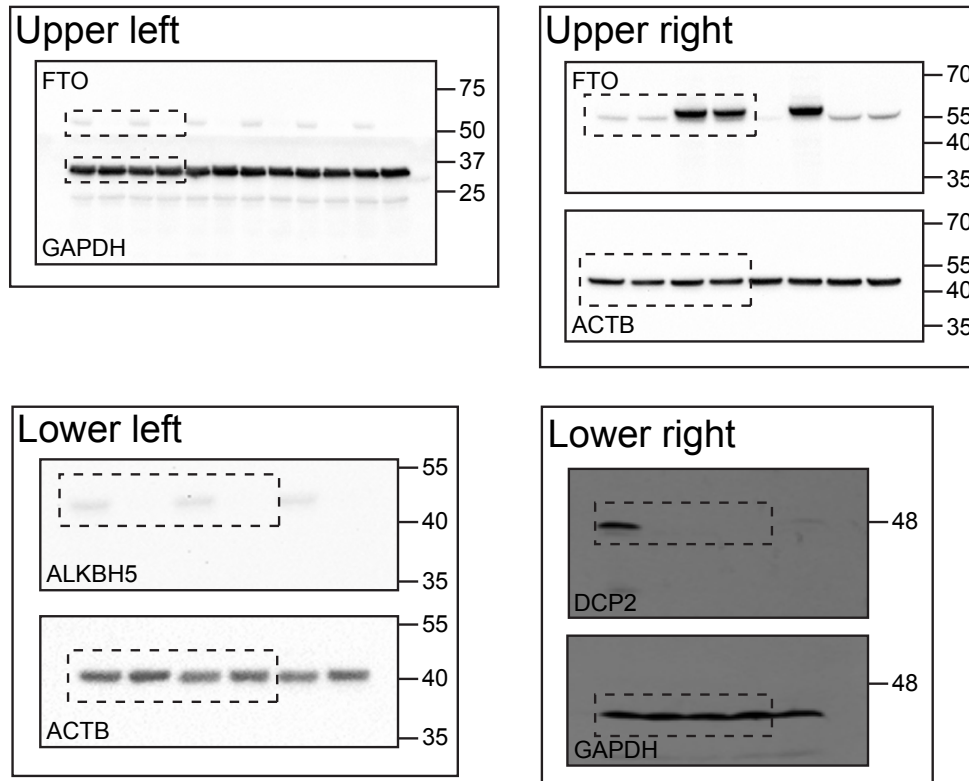

Supplement: NIHMS870376-supplement-Fig_S1.pdf [file NIHMS870376-supplement-Fig_S1.pdf]
